# Supplementary material
Source: Springer Nature journal article supplement (https://www.springermedizin.de/resource/supplementary/10194_2013_601_MOESM2_ESM.pdf/9423248)
Supplement: MOESM2 [file 9423248]

31 patients with sudden headache

Other secondary causes = 4

(+)

Vasoconstriction

(-)

14 patients

13 patients

RCVS

Single headache = 2\*  
Onset to peak > 1 minute = 1  
Moderate intensity = 1  
Lasting < 5 minutes = 1\*

9 patients

No headache triggers = 1

8 patients

Primary HSA = 2  
Primary exertional headache = 1

5 patients

Probable RCVS
